# Supplementary material for: High catalytic activity of Co3O4 nanoparticles encapsulated in a graphene supported carbon matrix for oxygen reduction reaction
Source: Royal Society of Chemistry journal article supplement (doi:10.1039/c6ra09528c), 2016-01-01
Supplement: c6ra09528c1.pdf [file c6ra09528c1.pdf]

## Supporting Information

### High Catalytic Activity of Co<sub>3</sub>O<sub>4</sub> Nanoparticles Encapsulated in the Graphene Supported Carbon Matrix for Oxygen Reduction Reaction

Guiting Xie,<sup>a,b</sup> Bohong Chen,<sup>b</sup> Zhongqing Jiang,<sup>c</sup> Xiaojun Niu,<sup>a,\*</sup> Si Cheng,<sup>b</sup> Zihao Zhen,<sup>b</sup> Yu Jiang,<sup>b</sup> Haibo Rong<sup>b</sup> and Zhong-Jie Jiang<sup>b,\*</sup>

<sup>a</sup> *College of Environment and Energy, South China University of Technology,*

*Guangzhou 510006, China*

<sup>b</sup> *New Energy Research Institute, College of Environment and Energy, South China*

*University of Technology, Guangzhou 510006, China.*

<sup>c</sup> *Department of Chemical Engineering, Ningbo University of Technology, Ningbo*

*315016, Zhejiang, China.*

\* *Corresponding author. E-mail address: [zhongjiejiang1978@hotmail.com](mailto:zhongjiejiang1978@hotmail.com) or*

*[eszjiang@scut.edu.cn](mailto:eszjiang@scut.edu.cn) (Z. -J. Jiang).*

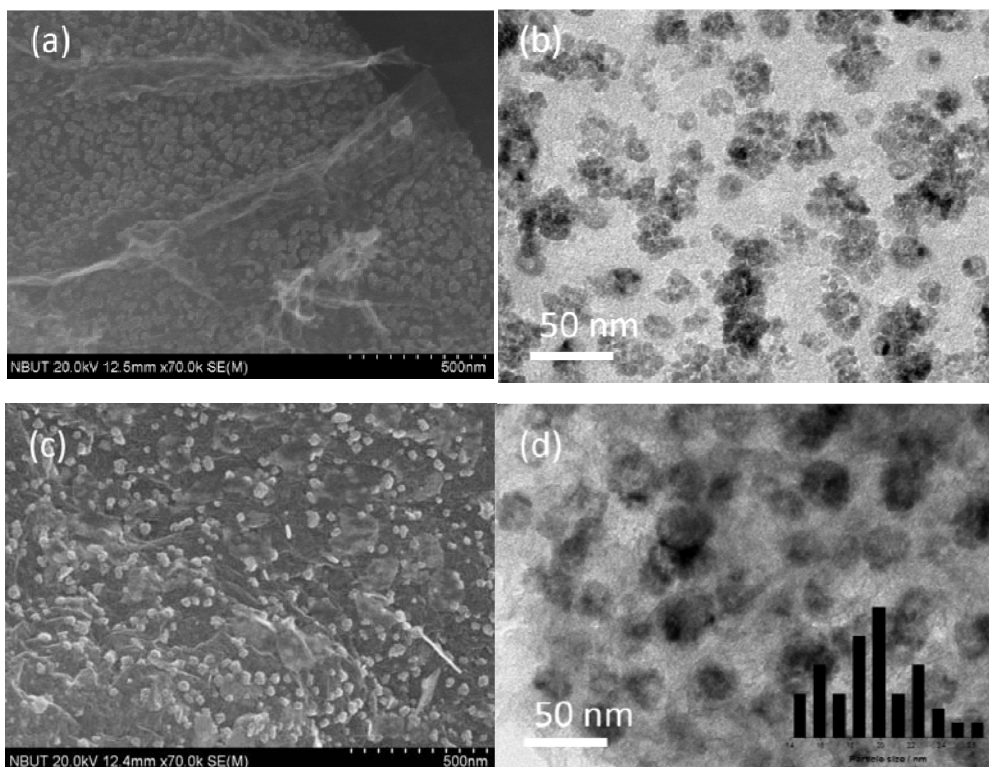

**Figure S1.** SEM images of (a) the CoMG and (c) the CoPG and TEM images of (b) the CoMG and (d) the CoPG. The insets in Figure S1d show the histogram of the  $\text{Co}_3\text{O}_4$  particle sizes.

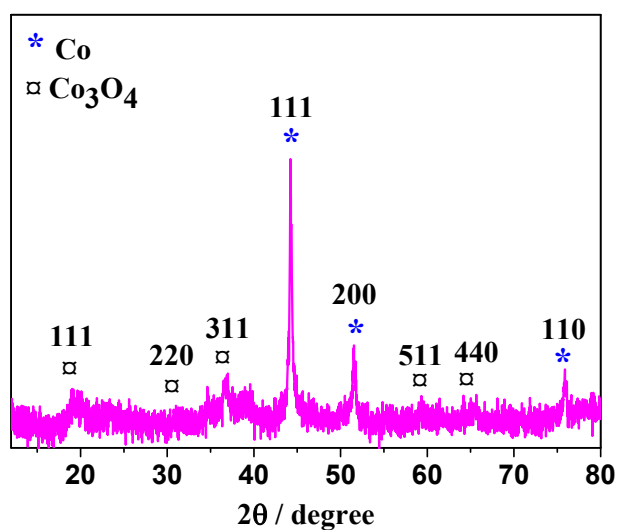

**Figure S2.** XRD patterns of the CoPM. The reflection peaks corresponding to the Co and  $\text{Co}_3\text{O}_4$  phases are indicated in the figure.

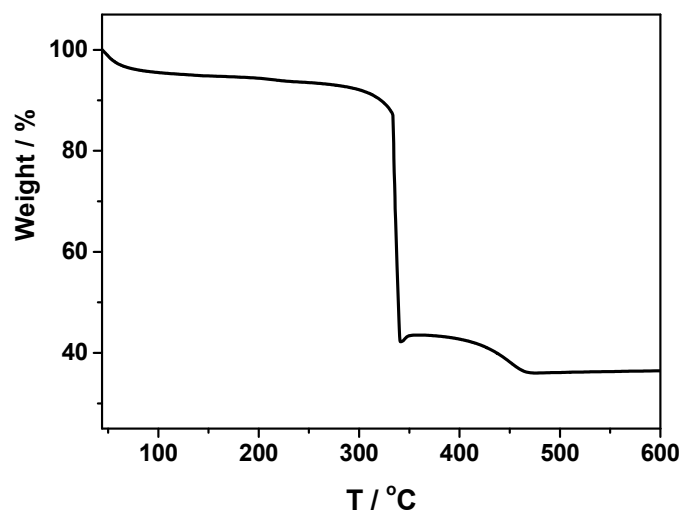

**Figure S3.** TGA curve of the CoPMG.

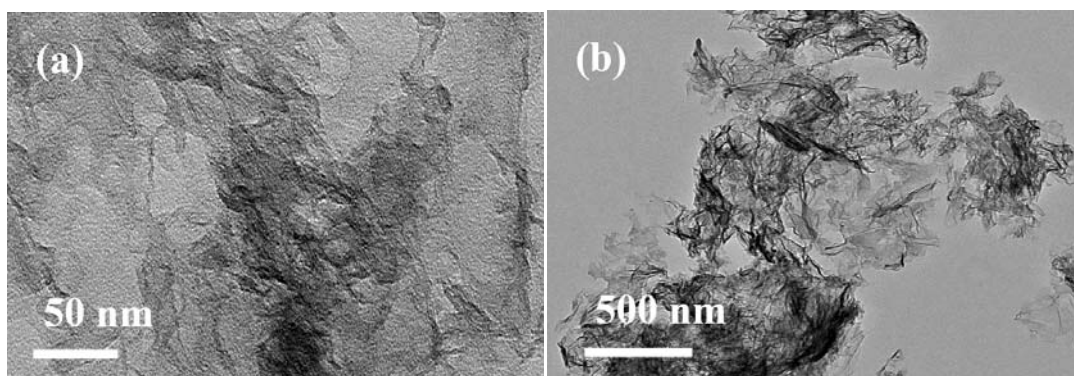

**Figure S4.** TEM images of the PMG synthesized through the acid etching of the CoPMG at (a) high and (b) low magnification.

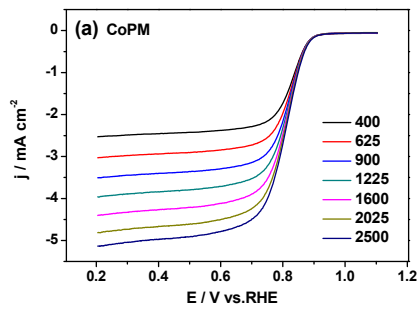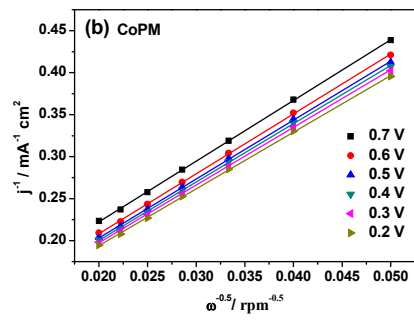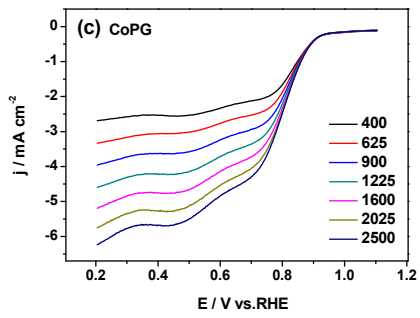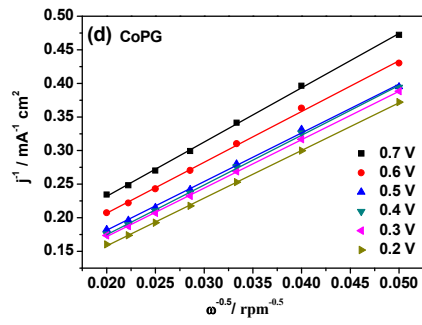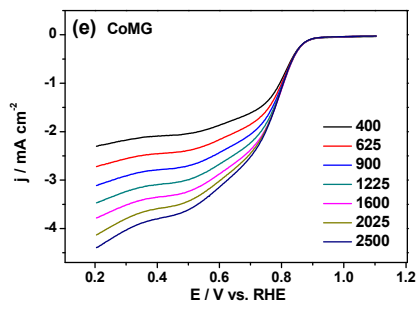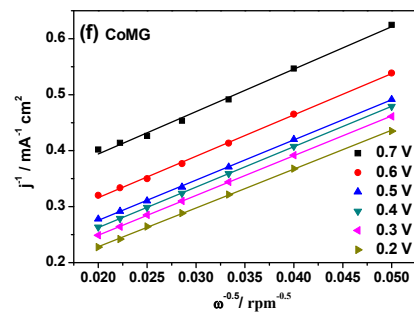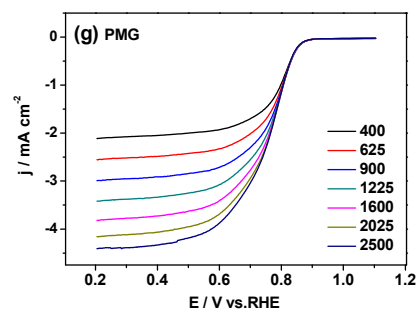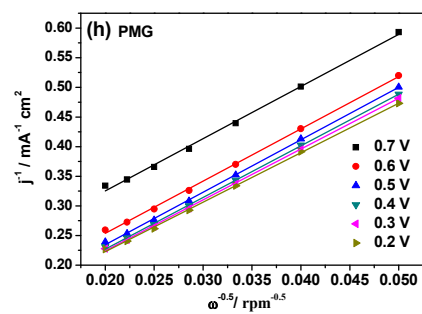

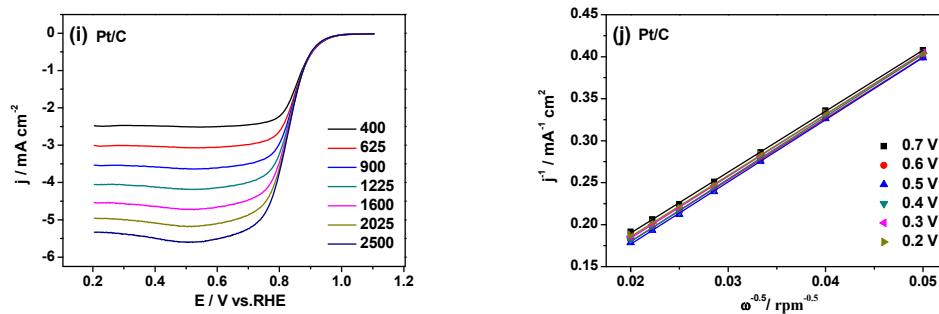

**Figure S5.** LSV curves at various different rotation rates for the ORR and corresponding K-L plots for (a, b) the CoPM, (c, d) the CoPG, (e, f) the CoMG, (g, h) the PMG, (i, j) the Pt/C 20 wt. %, in the O<sub>2</sub>-saturated 0.1 M KOH solution. The dots are the experimental results and the straight lines are their corresponding fittings using Equation 1.
